# Supplementary material
Source: PubMed Central journal article supplement (PMC6018359)
Supplement: JB.00152-18_zjb999094799s1.pdf [file JB.00152-18_zjb999094799s1.pdf]

1 **Supplemental material**

2

3 **Roles of Alanine Dehydrogenase and Induction of Its Gene in *Mycobacterium***  
4 ***smegmatis* under Respiration-inhibitory Conditions**

5

6 Ji-A Jeong,<sup>a</sup> Sae Woong Park,<sup>b</sup> Dahae Yoon,<sup>c</sup> Suhkmann Kim,<sup>c</sup> Ho-Young Kang,<sup>a</sup> and Jeong-Il  
7 Oh<sup>a#</sup>

8

9 <sup>a</sup>Department of Microbiology, Pusan National University, 46241 Busan, Korea

10 <sup>b</sup>Department of Microbiology and Immunology, Weill Cornell Medical College, New York,  
11 USA

12 <sup>c</sup>Department of Chemistry, Center for Proteome Biophysics and Chemistry Institute for Functional  
13 Materials, Pusan National University, 46241 Busan, Korea

14

15 Running title: Redox Homeostasis and Alanine Dehydrogenase

16

17 #Corresponding author

18 Jeong-Il Oh

19 Telephone: +82-51-510-2593

20 Fax: +82-51-514-1778

21 E-mail: joh@pusan.ac.kr

22

## 23 MATERIALS AND METHODS

### 24 Construction of mutant strains of *M. smegmatis*.

25 Deletion mutants of *M. smegmatis* were constructed by allelic exchange mutagenesis using the  
26 suicide vector pKOTs containing a temperature-sensitive replication origin (Table 1).

27 **(i)  $\Delta$ ald mutant.** To construct an *ald* deletion mutant, two rounds of recombination PCR were  
28 conducted. Using the chromosomal DNA of *M. smegmatis* mc<sup>2</sup>155 as a template, two primary PCR  
29 reactions were performed with the primers, F\_ald\_Mut (5'-  
30 GAAAGGATCCAGAACTGCTGCTCAAGGTG-3') and Rec\_ald\_R (5'-  
31 CAGTAGAAGATCGTGTCGTGGTTGAGATCGAACACCGTCAC-3'), as well as with the  
32 primers, Rec\_ald\_F (5'-GTGACGGTGTTCGATCTCAACCACGACACGATCTTCTACTG-3')  
33 and R\_ald\_Mut (5'-ATTAAAGCTTGATGGTGCGGACGCGCGG-3'), to generate two 41-bp  
34 overlapping DNA fragments (427 and 428 bp, respectively). Both PCR products contained the  
35 same 270-bp deletion within *ald* (*MSMEG\_2659*) in the overlapping region. In the secondary PCR,  
36 an 814-bp DNA fragment with in-frame deletion of *ald* was obtained using both the primary PCR  
37 products as templates and the primers, F\_ald\_Mut and R\_ald\_Mut. The secondary PCR product  
38 was restricted with HindIII and cloned into pKOTs digested with HindIII and EcoRV, yielding  
39 pKOTs $\Delta$ ald. The pKOTs $\Delta$ ald plasmid was introduced into *M. smegmatis* mc<sup>2</sup>155 by  
40 electroporation. Transformants were selected at 30°C (replication-permissive temperature) on  
41 7H9-glucose agar plates containing hygromycin, and the selected transformants were grown in  
42 7H9-glucose liquid medium supplemented with hygromycin for 3 days at 30°C. Heterogenotes of  
43 *M. smegmatis*, which were generated by a single recombination event, were selected for their  
44 hygromycin resistance on 7H9-glucose agar plates at 42°C (replication-nonpermissive  
45 temperature). The selected heterogenotes were grown on 7H9-glucose medium without antibiotics

46 for 3 days at 37°C. Isogenic homogenotes were obtained from the heterogenotes after a second  
47 recombination by selecting them for sucrose resistance on 7H9-glucose agar plates containing 10%  
48 (wt/vol) sucrose at 37°C.

49 **(ii)  $\Delta bd$  mutant.** For the construction of a deletion mutant of *cydA* encoding subunit I of the *bd*  
50 quinol oxidase, two primary PCR reactions were performed with the primers, F\_cydA\_Mut (5'-  
51 GGGGAAGCTTCGAGTCCACGTTTCATCGG-3') and R\_cydA\_rec (5'-  
52 CCGAACTTCTCCTCGTAGCTCGCGGCGTCGGCGGCCGATTC-3'), as well as with the  
53 primers, F\_cydA\_rec (5'-GAATCGGCCGCCGACGCCGCGAGCTACGAGGAGAAGTTCGG-  
54 3') and R\_cydA\_Mut (5'-AAAAGCGGCCGCCACCAGGCGTAAACC-3'), to generate two 41-  
55 bp overlapping DNA fragments (379 and 408 bp, respectively), both encompassing the same 300-  
56 bp deletion within *cydA* (*MSMEG\_3233*) in the overlapping region. In the secondary PCR, a 746-  
57 bp DNA fragment with in-frame deletion of *cydA* was obtained using both the primary PCR  
58 products as templates and the primers, F\_cydA\_Mut and R\_cydA\_Mut. The secondary PCR  
59 product was restricted with NotI and HindIII and cloned into pKOTs digested with the same  
60 enzymes, yielding pKOTs $\Delta bd$ . The allelic exchange using pKOTs $\Delta bd$  was performed in the same  
61 way as construction of the  $\Delta ald$  mutant.

62 **(iii)  $\Delta aa_3$  mutant.** To introduce an in-frame deletion into *ctaC* (*MSMEG\_4268*) encoding subunit  
63 II of the *aa\_3* cytochrome *c* oxidase, two primary PCR reactions were performed with the primers,  
64 F\_ctaC\_Mut (5'-GTTTGGATCCGCGCCAGTATGTCTGATC-3') and R\_ctaC\_rec (5'-  
65 GAGTTCAGGACGAACTCGATGAACGGGATGACCGTCAGCG-3'), as well as with the  
66 primers, F\_ctaC\_rec (5'-CGCTGACGGTCATCCCGTTCATCGAGTTCGTCCTGAACTC-3')  
67 and R\_ctaC\_Mut (5'-GTTTAAGCTTGAGCACGGCGTACACCACC-3'), to generate two 40-bp  
68 overlapping DNA fragments (497 and 489 bp, respectively), both bearing the same 351-bp deletion

69 within *ctaC* (*MSMEG\_4268*) in the overlapping region. In the secondary PCR, a 946-bp DNA  
70 fragment with in-frame deletion of *ctaC* was obtained using both the primary PCR products as  
71 templates and the primers, F\_*ctaC*\_Mut and R\_*ctaC*\_Mut. The secondary PCR product was  
72 restricted with HindIII and cloned into pKOTs digested with HindIII and EcoRV, yielding  
73 pKOTs $\Delta$ aa3. The allelic exchange using pKOTs $\Delta$ aa3 was conducted as described above.

74 **(iv)  $\Delta$ *bd* $\Delta$ *ald* mutant.** The  $\Delta$ *bd* $\Delta$ *ald* double mutant was constructed using the  $\Delta$ *ald* mutant and  
75 pKOTs $\Delta$ *bd* in the same way as the construction of the  $\Delta$ *bd* mutant.

76 The allelic exchange in the mutants constructed in this study was verified by PCR with isolated  
77 genomic DNA (Fig. S3).

78

#### 79 **Construction of plasmids.**

80 **(i) pMV306*ctaC* and pMV306*ald*.** pMV306*ctaC* was constructed for complementation of the  
81  $\Delta$ aa3 mutant. A 1,380-bp DNA fragment containing the *ctaC* gene of *M. smegmatis* was amplified  
82 with the primers, F\_*ctaC*\_comp (5'-GAAATCTAGACCAGCTGAGATCCGGTTC-3') and  
83 R\_*ctaC*\_Mut, using chromosomal DNA of *M. smegmatis* mc<sup>2</sup>155 as a template. The PCR product  
84 was restricted with XbaI and HindIII and cloned into the pMV306 integration vector, yielding  
85 pMV306*ctaC*.

86 To complement the  $\Delta$ *ald* mutant, pMV306*ald* carrying a 1,554-bp XbaI-HindIII fragment with  
87 the *ald* gene of *M. smegmatis* was constructed in the same way as pMV306*ctac*, except using the  
88 primers, R\_279bp (5'-AAAATCTAGAACGCGTCCGTGGCACGTC-3') and R\_ald\_Mut.

89 **(ii) pNBV1*cydA*.** To construct pNBV1*cydA* for complementation of the  $\Delta$ *bd* mutant, a 1,932-bp  
90 DNA fragment containing the *cydA* gene of *M. smegmatis* was amplified with the primers,

91 F\_cydA\_com (5'-ATTTTCTAGAATCGCTCGCGACGCTGGC-3') and R\_cydA\_com (5'-  
92 ATTTAAGCTTGCCGTCCCACACCGGTCC-3'), using chromosomal DNA of *M. smegmatis*  
93 mc<sup>2</sup>155 as a template. The PCR product was restricted with XbaI and HindIII and cloned into the  
94 pNBV1 shuttle vector, resulting in pNBV1cydA.

95

96 **FIGURES**

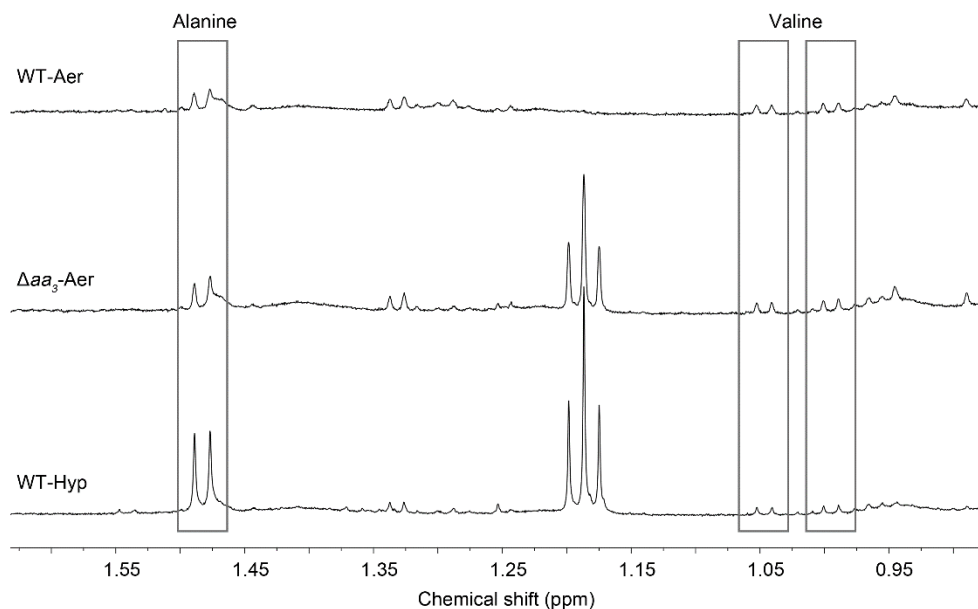

97  
98 **FIG S1** 600 MHz <sup>1</sup>H-NMR spectra of the WT and Δaa<sub>3</sub> mutant strains of *M. smegmatis* grown  
99 either aerobically (Aer) or under hypoxic conditions (Hyp). The regions representing the alanine  
100 and valine peaks in NMR spectra (δ 0.9-1.65) are magnified. The peaks of alanine CH<sub>3</sub> signal at  
101 1.47 ppm and valine CH<sub>3</sub> signals at 0.98 and 1.03 ppm are boxed.  
102

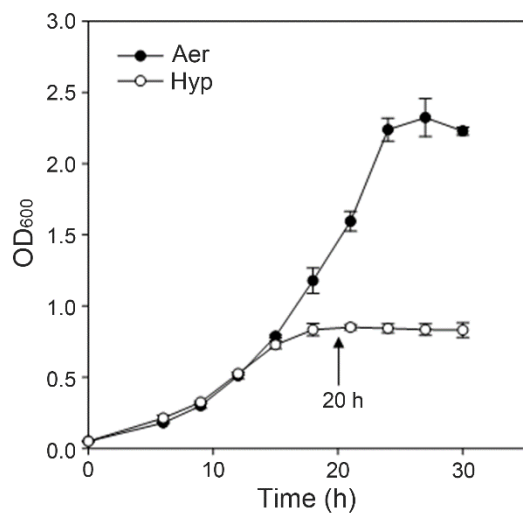

103

104 **FIG S2** Growth of *M. smegmatis* WT strain under aerobic and hypoxic conditions. The strain was  
 105 grown in 7H9-glucose medium either aerobically (Aer) or under hypoxic conditions (Hyp) as  
 106 described in Materials and Methods, and their growth was monitored spectrophotometrically at  
 107 600 nm at 3 h intervals for 30 h. The arrow indicates the time point of harvest for hypoxic cultures  
 108 used in this study. All values provided are the averages of the results from three independent  
 109 determinations. Error bars indicate the standard deviations.

110

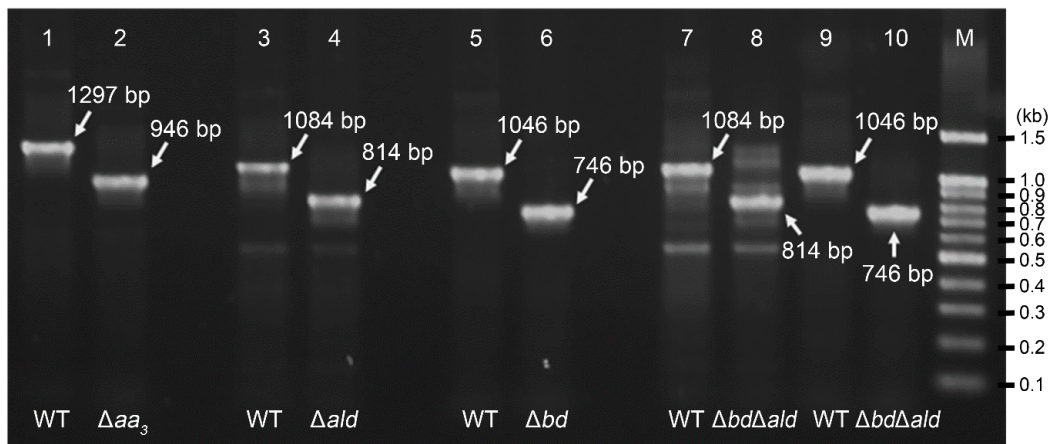

111  
 112 **FIG S3** Validation of the  $\Delta aa_3$ ,  $\Delta ald$ ,  $\Delta bd$ , and  $\Delta bd\Delta ald$  mutant strains of *M. smegmatis* by PCR.  
 113 The PCR reactions were carried out using the genomic DNA from the WT,  $\Delta aa_3$ ,  $\Delta ald$ ,  $\Delta bd$ , and  
 114  $\Delta bd\Delta ald$  mutant strains of *M. smegmatis* with the following primer sets: F\_ *ctaC*\_Mut/R\_ *ctaC*\_Mut  
 115 to confirm deletion of *ctaC* (lanes 1 and 2); F\_ *ald*\_Mut/R\_ *ald*\_Mut to confirm deletion of *ald*  
 116 (lanes 3, 4, 7 and 8); F\_ *cydA*\_Mut/R\_ *cydA*\_Mut to confirm deletion of *cydA* (lanes 5, 6, 9, and  
 117 10). Lane M indicates the DNA size marker. Expected sizes of PCR products are shown with the  
 118 arrows.

119
